# Supplementary material for: Intensity-modulated radiotherapy for prostate cancer with seminal vesicle involvement (T3b): A multicentric retrospective analysis
Source: PLoS One. 2019 Jan 25;14(1):e0210514. doi: 10.1371/journal.pone.0210514 (PMC6347455; doi:10.1371/journal.pone.0210514)
Supplement: S1 Dataset — (XLSX) [file pone.0210514.s001.xlsx]

## Sheet: Feuil1
centre	age	follow-up	event_dfs	death	Pca_specific_death	anticoagulant	hta	cardio_vsacular	diabetis	pelvic surgery	t_stage	psa	ratio_positive prostate biopsy	biopsies_sv	positives_biopsy SV	gleason	irm_extension_extracapsular	bilateral involv_ prostate	bilateral_involv_vs	global_vs_tiers_moy	global_vs_tiers_dital	limite_tiers_prox	limite_tiers_moy	totalite_vs	ivS	nb of involved segment	LN_posi	nb_LN_posi	duration_ADT	RT duration	dose_prostate	dose_prostate_corr	dose_ivss	dose_healthy vs	dose_LN_proph	dose_involvedLN	dose_fraction	SIB	delineation_paroi	rectum_v30	r_v40	r_v50	r_v60	r_v65	r_v70	r_v75	bladder_v50	bladder_v60	bladder_v70
lille	76	21	0	0	0	1	1	1	0	1	2	18	0.214286	1	1	7	1	1	0	0	0	1	0	0	1	2	0	0	5.01639	50	74	74	74	46	46		2	0	1	66	48	33	21	14	7	2	29	23	8
lille	66	37	1	1	1	0	1	0	1	0	3	20	0.833333	0	0	8	1	1	0	0	0	1	0	0	1	1	0	0	8.13115	45	70.2	70.2	70	0	0		2	0	1	33	16.7	9	1.5	0	0	0	8.7	3.04	0
lille	72	35	0	0	0	1	0	1	0	1	3	160	1	0	0	7	1	1	1	0	0	1	0	0	1	2	0	0	35.377	52	76	76	50	50	50		2	0	1	65	20	10	5	3	2	1	18	11	6
lille	71	31	0	0	0	1	0	0	1	0	3	40.47	0.666667	0	0	7	1	1	1	1	1	0	0	1	3	6	0	0	34.918	57	76	76	50	50	50		2	0	1	45	31	21	12	8	4	1	10	6	3
lille	63	34	0	0	0	0	0	0	0	0	3	8.5	0.75	0	0	8	1	1	0	0	0	1	0	0	1	1	1	1	35.9344	55	74	74	74	50	50	50	2	0	1	51	33	24	15	11	5	2	41	29	18
lille	70	21	0	0	0	1	0	1	1	0	3	12.5	0.538462	0	0	7	1	1	0	0	0	1	0	0	1	1	0	0	22.1639	56	78	78	78	50	50		2	0	1	43	19	12	8	6	3	0	17	10	4
lille	71	53	0	0	0	1	0	0	0	0	2	5.77	0.266667	1	1	9	0	0	0	0	0	1	0	0	1	1	0	0	57.6066	41	75.9	75.9	76	50	50.4		2	0	1	70.64	44.68	23.1	12.86	8.36	3.87	0.44	6.69	3.09	1.02
lille	68	29	0	0	0	0	1	0	0	0	2	11.51	1	0	0	6	0	1	0	0	0	1	0	0	1	1	0	0	30.5902	52	76	76	76	46	46		2	0	1	66	50	37	24	18	12	3	45	30	16
lille	65	83	0	0	0	1	1	1	0	1	2	7.18	0.333333	0	0	8	1	0	0	0	0	1	0	0	1	1	1	0	35.3115	53	75.5	75.5	76	50	64	64	2	0	1
lille	71	20	0	0	0	0	0	0	0	0	3	77	1	0	0	9	1	1	1	0	0	1	0	0	1	2	0	0	21.9672	52	76	76	76	76	50		2	0	1	71	53	38	28	22	17	8	20	12	7
lille	67	40	0	0	0	0	1	0	0	0	3	49.83	1	0	0	7	1	1	0	0	0	1	0	0	1	1	1	5	41.5738	57	75.6	75.6					2	0	1
lille	66	22	1	1	0	0	0	0	0	0	3	7.2	0.857143	0	0	7	1	1	1	1	1	0	0	1	3	6	0	0	18.9836	51	72	72	72	72	0		2	0	1	48	31	22	14	10	5	0	49	33	18
lille	48	30	0	0	0	0	0	0	0	0		7.8	1	0	0	8	1	1	1	0	0	1	0	0	1	2	1	6	29.8689	58	74	74	74	50	50	50	2	0	1
lille	58	30	0	0	0	1	0	1	0	0		11.66	0.6	0	0	7	1	0	0	0	0	1	0	0	1	1	0	0	5.5082	51	76	76	76	76	46		2	0	1	86	58	42	28	20.5	13	5.5	34	21	8
lille	81	22	1	1	1	1	0	1	0	0	3	27	0.714286	0	0	8	1	1	1	1	0	0	1	0	2	4	1	1	24.2295	54	74	74	74	74	46	66	2	0	1	41	21	12	6	4	2	0	21	15	8
lille	73	83	0	0	0	0	1	0	0	1		18.84		0	0	9	1	0	0	1	0	0	1	0	2	2	1	0	48.1967	54	70	70			50.4	50	2	0	1	73.63	46.52	35.86	23.8	17.04	10.06	2.53	13.03	6.58	1.92
lille	60	40	0	0	0	0	1	0	0	1	3	14	0.642857	1	1	9	0	1	1	1	1	0	0	1	3	4	0	0	30.3607	53	76	76	76	50	50		2	0	1	78	52	37	23	17	10	3	32	20	9
lille	77	27	0	0	0	1	0	0	1	0	3	8	0.416667	0	0	8	1	0	0	0	0	1	0	0	1	1	0	0	28.9508	51	74	74	74	74	46		2	0	1	45	29	20	13	9	5	0.4	23	16	8
lille	84	29	0	0	0	0	1	0	0	0		7.7	0.666667	0	0	7	1	1	0	0	0	1	0	0	1	1	0	0	30	52	76	76	76	76	50		2	0	1	84	56	38	25	17	11	3	26.5	15	6
lille	72	36	0	0	0	0	1	0	0	0	3	41	0.666667	0	0	7	1	0	1	1	0	0	1	0	2	2	0	0	37.4426	54	76	76	76	50	50		2	0	1	71	34	23	14	9	5	0	42	33	18
lille	74	33	0	0	0	1	1	1	0	1	2	7.57	0.9375	1	1	8	1	0	0	0	0	1	0	0	1	1	0	0	35.377	51	74	74	74	74	50		2	0	1	78	54	36	25	19	13	4	46	33	17
lille	65	26	0	0	0	1	1	1	0	1		18.6	1	0	0	8	1	1	1	1	1	0	0	1	3	6	1	2	33.7705	53	76	76	76	76	46	46	2	0	1	55	34	19	8	5	3	1	25	17	8
lille	70	19	0	0	0	1	1	0	0	0	3	7.6	1	0	0	7	1	0	0	0	0	1	0	0	1	1	0	0	21.2131	57	78	78	78	78	50		2	0	1	52	34	22	10	6	2	0	16	13	8
lille	60	6	0	0	0	0	0	0	0	0		25	1	0	0	7	1	1	1	0	1	0	0	1	3	1	1	1	8.7541	52	78	78	78	78	50	60	2	0	1	76	58	44	28	20	14	7	36	25	15
lille	59	6	0	0	0	1	1	0	0	0	3	4.4	0.5	0	0	7	1	1	1	0	0	1	0	0	1	2	0	0	7.7377	54	78	78	78	46	46		2	0	1	44	29	20	12	8	5	2	20	13	7.5
lille	74	11	0	0	0	1	1	1	1	1	3	14.7		0	0	7	1	0	0	0	0	1	0	0	1	1	0	0	16	55	76	76	76	76	50		2	0	1	61	46	35	24	18	12	4	30	22	13
lille	84	6	0	0	0	0	0	0	0	1		10	0.714286	0	0	8	0	1	0	1	1	0	0	1	3	3	1	0	8.88525	55	76	76	76	76	46	46	2	0	1	80	62	47	33	26	18	9	35	22	10
lille	68	18	0	0	0	0	0	0	1	0	3	15	0.5	0	0	10	1	1	1	1	1	0	0	1	3	6	1	1	20.459	51	76	76	76	76	50	50	2	0	1	78	49	35	23	17	11	5	39	28	16
lille	76	14	0	0	0	1	0	1	0	0	3	18.25		0	0	7	1	1	1	1	0	0	1	0	2	4	1	2	18.3934	55	76	76	76	50	50	50	2	0	1	54	29	21	13	9	5	2	18	10	5
lille	75	24	0	0	0	1	0	1	0	0	3	23	0.75	0	0	7	1	1	0	0	0	1	0	0	1	1	1	2	25.8033	58	76	76	76	76	50	64	2	0	1	98	50	26	17	13	8	4	19	10	5
lille	61	19	0	0	0	0	1	0	0	0		19	1	0	0	7	0	1	0	0	0	1	0	0	1	1	0	0	6.68852	39	70	70			50		2	0	1
lille	55	10	0	0	0	0	0	0	0	0	3	37.05	1	0	0	8	1	1	1	1	1	0	0	1	3	5	1	0	12.3279	51	76	76	76	76	50	56	2	0	1	69	45	29	15	11	6	2	27	17	9
lille	48	68	1	0	0	0	0	0	0	0	3	200		0	0	9	1	1	1	0	0	1	0	0	1	2	1	3	70.9836	50	75.9	75.9			64.4	64.4	2	0	1	92.48	44.39	21.54	10.85	7.06	4.02	0.45	19.6	8.44	2.4
vannes	72	13	0	0	0	0	1	0	0	0		2.69		0	0	7	1	0	0	1	0	0	1	0	2	2	0	0	14.5574	57	77	77	77	61	45		2	0	0	39.17	22.73	14.2	8.07	5.65	3.5	1.16	19	13.6	9.13
vannes	70	4	0	0	0	0	0	0	0	1	3	99	1	0	0	8	1	1	0	1	0	0	1	0	2	2	1	0	5.44262	51	78	78	64	64	50	50	2	0	0	27.7	12.8	5.87	2.6	1.41	0.46	0	13.83	10.51	7.2
vannes	69	12	0	0	0	1	0	1	1	0		5.16	0.9375	0	0	7	1	0	0	0	0	1	0	0	1	1	0	0	13.541	52	77	77	77	61	45		2	0	0	43.5	28.7	18.56	12.07	9.13	6.13	2.47	47.67	36	24.8
vannes	68	22	0	0	0	1	0	1	0	1	2	14	0.583333	0	0	7	0	0	0	0	0	1	0	0	1	1	0	0	0	50	74	74	74	74	0		2	0	0	31	18.55	10.7	5.29	3.33	1.38	0	8.87	6.46	4.34
vannes	79	16	0	0	0	0	0	0	0	1	3	70		0	0	7	0	0	0	0	0	1	0	0	1	1	0	0	17.8689	56	77	77	77	61	45		2	0	0	42.86	24.24	14.9	8.33	5.61	2.91	0.15	23.66	16.08	9.8
vannes	77	24	1	0	0	0	0	0	0	0	3	7.47	0.666667	0	0	8	1	1	1	0	0	1	0	0	1	2	1	0	26.5246	55	75	75	75	65	45	65	2	0	1	76.64	58.05	32.1	21.14	17.67	14.15	4.1	38.08	27.23	19.19
vannes	73	26	0	0	0	1	1	1	1	0		5.57	0.75	0	0	7	1	1	1	0	0	1	0	0	1	2	0	0	29.377	55	77	77	77	61	45		2	0	0	52.66	40.96	31.5	21.93	16.7	11.47	5.18	15.02	9.63	4.73
vannes	78	29	0	0	0	0	0	0	0	1	2	8.7	0.583333	0	0	7	0	1	0	0	0	1	0	0	1	1	0	0	30.1639	55	77	77	77	61	45		2	0	0	87.11	71.5	53.72	36.05	28.41	19.13	7.46	19.75	12.98	7.31
vannes	63	18	0	0	0	0	1	0	0	0		16	0.833333	0	0	7	0	1	0	0	0	1	0	0	1	1	0	0	19.5738	57	77	77	77	61	45		2	0	0	51.83	37.18	26.62	17.27	12	6.56	1.33	70	56.59	40
vannes	77	14	0	0	0	1	0	1	0	1		15	0.666667	0	0	9	0	0	0	0	0	1	0	0	1	1	0	0	16.3279	57	77	77	77	61	45		2	0	0	37.5	26.38	18.3	11.27	8.2	5.55	3.11	42.2	32.5	22
vannes	81	14	0	0	0	0	1	0	0	0		16	0.25	0	0	7	1	0	0	1	1	0	0	1	3	3	0	0	19.082	57	77	77	77	61	45		2	0	0	46.93	28.32	18.69	11.88	8.97	6.28	3.6	30.51	22.55	15.1
vannes	73	6	0	0	0	1	1	0	0	0	3	35	0.666667	0	0	8	1	1	1	1	0	0	1	0	2	4	1	0	8.03279	55	78	78	64	64	50	56	2	0	0	19.23	11.28	5.74	1.94	0.82	0.27	0	19.03	13.83	9.24
vannes	66	15	0	0	0	1	0	1	0	0	2	9.55	0.583333	0	0	9	0	0	0	0	0	1	0	0	1	1	0	0	0	55	77	77	77	61	45		2	0	0	66.56	52	25.99	12.37	7.59	3.55	0.84	30.32	19.74	11.82
vannes	77	20	0	0	0	0	0	1	0	0	3	97	0.75	0	0	7	1	1	1	0	0	1	0	0	1	2	0	0	20.4262	55	77	77	77	61	45		2	0	0	69.7	53.34	39.72	27.51	21.48	15.66	8.58	19.82	13.78	8.69
vannes	64	3	0	0	0	1	1	0	1	1	2	3.3	1	0	0	8	1	1	0	1	1	0	0	1	3	3	0	0	10.9836	53	78	78	64	64	50		2	0	0	83.44	66.06	51.02	33.37	23.46	14.95	6.57	0.36	0	0
vannes	75	8	0	0	0	0	0	0	0	0		27	0.166667	0	0	7	1	0	0	0	0	1	0	0	1	1	0	0	9.86885	51	76	76	64	64	50		2	0	0	67.74	56.55	39.51	28.45	21.62	14.6	5.85	6.03	1.75	0.15
vannes	81	5	0	0	0	0	0	0	0	0	2	14.2	0.166667	0	0	8	0	0	1	0	0	1	0	0	1	2	0	0	5.01639	28	59.4		59.4	0	0		2.7	0	0	49.35	35.3	22.33	2.72	0	0	0	8.27	1.68	0
vannes	67	12	0	0	0	0	0	0	0	0	2	4.04	0.416667	0	0	8	1	0	0	1	0	0	1	0	2	2	0	0	13.7377	57	77	77	77	61	45		2	0	0	55.52	46.7	35.52	19.84	12.67	8.35	3.87	12.06	3.48	0.23
vannes	74	25	0	0	0	0	0	1	0	0	3	27	0.666667	0	0	7	1	1	0	1	1	0	0	1	3	3	0	0	26.1967	57	77	77	77	45	45		2	0	1	76.5	52.95	28.87	20.46	16.8	12.97	6.84	14.19	9.97	7.19
vannes	65	8	0	0	0	1	0	0	0	0		29	0.789474	0	0	7	1	0	0	0	0	1	0	0	1	1	0	0	9.5082	53	78	78	78	64	50		2	0	0	67.7	50.15	38.54	28.76	24.27	19.12	12.91	31.46	21.44	13.81
vannes	80	8	0	0	0	1	0	1	0	0		12	0.416667	0	0	6	1	1	0	0	0	1	0	0	1	1	0	0	0	28	60		0	0	0		3	0	0	21	14.27	9.8	3.3	0	0	0	3	0.96	0
vannes	70	26	0	0	0	0	0	0	0	0	2	36	1	0	0	7	1	1	0	1	0	0	1	0	2	2	0	0	27.377	59	77	77	61	61	45		2	0	0	43.63	31.38	22.52	13.4	8.01	3.28	0.81	26.88	18.78	10.17
vannes	80	3	0	0	0	0	0	0	0	0	3	32	0.166667	0	0	8	0	0	0	0	0	1	0	0	1	1	0	0	5.77049	53	76	76	76	56	46		2	0	1	58.18	36.7	29.87	22.11	18.24	13.8	0.57	36.41	28.73	22.17
vannes	68	14	0	0	0	0	1	0	0	0	2	6	0.916667	0	0	7	1	1	0	0	0	1	0	0	1	1	0	0	9.90164	65	77	77	77	61	45		2	0	0	60.49	47.72	35.03	21	14.6	10.2	4.5	14.73	8.9	5.8
vannes	78	28	0	0	0	0	1	1	0	1	3	108	0.727273	0	0	7	1	1	0	0	0	1	0	0	1	1	0	0	29.2131	55	75	75	75	59	45		2	0	1	41.94	23.39	11.57	7.34	5.19	3.22	0.07	45.81	36.42	25.23
vannes	74	4	0	0	0	1	0	1	0	1		19	0.25	0	0	7	1	0	0	0	0	1	0	0	1	1	0	0	3.01639	52	78	78	64	64	50		2	0	0	56.12	40.81	29.53	20.31	15.93	11.7	6.68	18.37	12.42	7.94
nantes	80	22	1	1	0	0	0	0	0	0	3	20.85	0.5	0	0	7	0	1	1	0	0	1	0	0	1	2	1	0	23.6066	50	74.8	74.8	54.4	54.4	54.4	54	2,2-1,6	1	0	87	47	37	23	20	15	8	24	13	8
nantes	60	8	0	0	0	0	0	0	0	0	3	111	1	0	0	7	1	1	1	0	0	1	0	0	1	2	0	0	9.96721	57	74.8	74.8	74.8	54.4	54.4		2,2-1,6	1	0	43	30	18	8	7	5	2	18	6	3
nantes	73	66	0	0	0	0	1	0	0	0		9.44		0	0	7	0	1	1	0	0	1	0	0	1	2	0	0	8.95082	58	70	70	70		0		2	0	0
nantes	64	30	0	0	0	0	0	0	0	0	3	140	1	0	0	9	1	1	0	0	0	1	0	0	1	1	0	0	33.6393	59	74.8	74.8	74.8	74.8	54.4		2,2-1,6	1	0	100	78	55	28	22	14	7	27	16	7
nantes	73	46	0	0	0	1	1	1	0	1	3	10.75	0.583333	0	0	7	1	1	1	0	0	1	0	0	1	2	0	0	17.082	56	74.8	74.8	74.8	74.8	54.4		2,2-1,6	1	0	71	55	37	18	11	5	2	40	25	13
nantes	77	49	0	0	0	0	0	0	0	0	2	6.31	0.526316	0	0	7	0	1	1	0	0	1	0	0	1	2	0	0	35.9344	52	74.8	74.8	74.8	74.8	54.4		2,2-1,6	1	0	85	66	50	35	25	15	5	45	31	19
nantes	64	6	0	0	0	0	0	0	0	1	2	16	0.5	0	0	7	1	0	1	1	0	0	1	0	2	4	0	0	8.62295	61	78	78	0	0	0		2	0	1	48	40	31	24	22	19	3	18	15	12
nantes	78	5	0	0	0	1	0	0	0	0	3	14.88	0.769231	0	0	7	1	1	0	1	1	0	0	1	3	3	0	0	6.4918	57	77	77	55	55	55		2,08-1,48	1	1	79	54	40	27	23	19	13	45	35	27
nantes	73	6	0	0	0	0	0	0	0	0	1	6.13	0.333333	0	0	8	1	1	1	1	1	0	0	1	3	6	0	0	8.19672	56	77	77	55	55	55		2,08-1,48	1	0	59	41	28	19	13	12	7	34	24	18
nantes	76	56	0	0	0	0	0	0	1	1		9.36	0.666667	0	0	8	0	1	0	0	0	1	0	0	1	1	0	0	47.2787	54	74.8	74.8	74.8	74.8	54.4		2,2-1,6	1	0	67	45	28	15	11	7	2	28	16	8
nantes	78	52	0	0	0	1	0	1	0	1	1	6.1	0.25	0	0	7	0	0	0	1	0	0	1	0	2	2	0	0	27.0492	46	74.8	74.8	74.8	54.4	54.4		2,2-1,6	1	0	59	38	28	20	17	13	7	34	25	17
nantes	68	117	0	0	0	0	0	0	0	0		17		0	0	6	0	1	1	0	0	1	0	0	1	2	1	0	35.9016	61	76	76	76	50	50	50	2	0	0
nantes	73	58	1	1	1	0	1	0	1	0	1	9.9	1	0	0	8	1	1	1	1	1	0	0	1	3	6	1	4	35.9344	56	76	76	76	50	50	50	2	0	0
nantes	71	31	0	0	0	1	1	0	1	0	2	15.04	0.176471	0	0	8	0	0	0	1	0	0	1	0	2	2	0	0	32.9508	41	74.8	74.8	74.8	54.4	54.4		2,2-1,6	1	0
nantes	75	38	0	0	0	0	0	0	0	1	3	20	1	0	0	7	1	1	1	1	0	0	1	0	2	3	0	0	35.9016	51	70	70	70	0			2	0	0	52	35	28	18	10	2	0	23	18	2
nantes	78	13	0	0	0	0	1	0	0	0	2	8	1	0	0	9	1	0	0	0	0	1	0	0	1	1	0	0	15.2459	52	74.8	74.8	54.4	54.4	54.4		2,2-1,6	1	1	72	56	34	20	15	12	6	32	12	8
nantes	79	43	0	0	0	1	1	1	0	1	1	11	0.285714	0	0	7	1	1	0	0	0	1	0	0	1	1	0	0	0	33	62		0	0	0		3.1	0	1	75	45	32	23	18	14	0	37	29	20
nantes	58	41	0	0	0	0	0	0	0	0	2	15	0.583333	0	0	9	1	1	0	0	0	1	0	0	1	1	0	0	43.541	49	74.8	74.8	74.8	54.4	54.4	0	2,2-1,6	1	0	76	56	43	31	25	18	9	47	31	20
nantes	75	41	0	0	0	0	0	0	0	0	3	5.1	0.458333	0	0	7	1	0	0	0	0	1	0	0	1	1	0	0	35.9344	55	76	76	76	0	0		2	0	0	65	45	30	21	18	10	3	35	29	20
nantes	63	56	0	0	0	0	0	0	0	0	3	31	1	0	0	9	1	1	1	1	0	0	1	0	2	4	0	0	40.6557	63	80	80		46	46		2	0	0
nantes	75	29	0	0	0	0	0	0	0	1	1	10.79	0.176471	0	0	7	1	0	0	0	0	1	0	0	1	1	0	0	20.6557	49	74.8	74.8	54.4	54.4	54.4		2,2-1,6	1	0	65	46	30	18	15	11	7	50	38	27
nantes	80	18	0	0	0	0	1	0	0	1	3	14.69	1	0	0	9	1	1	1	1	1	0	0	1	3	6	0	0	19.5082	48	74.8	74.8	54.4	54.4	54.4		2,2-1,6	1	0	59	36	28	10	8	6	3	27	17	10
nantes	52	57	1	0	0	0	0	0	0	0		8	0.857143	0	0	7	1	0	1	1	0	0	1	0	2	3	1	0	8.09836	14	66		66	66	56	56	2	0	0
nantes	64	9	0	0	0	0	1	0	0	0	3	140	1	0	0	8	1	1	1	0	0	1	0	0	1	2	0	0	12.8197	51	74.8	74.8	54.4	54.4	54.4		2,2-1,6	1	0	40	23	12	8	7	2	1	38	20	15
nantes	66	60	1	1	0	0	1	0	0	0	3	2.57	0.833333	0	0	7	1	0	0	0	0	1	0	0	1	1	0	0	35.9016	56	74.8	74.8	74.8	74.8	54.4		2,2-1,6	1	0	58	44	33	22	16	8	2	37	24	12
nantes	69	25	0	0	0	1	1	0	0	0	2	9	0.375	0	0	8	1	1	0	0	0	1	0	0	1	1	0	0	27.8033	50	74.8	74.8	54.4	54.4	54.4		2,2-1,6	1	0	78	50	35	22	18	14	8	17	11	7
nantes	68	20	0	0	0	0	0	0	0	0	2	9.35	1	0	0	7	0	0	0	0	0	1	0	0	1	1	0	0	23.9672	49	74.8	74.8	74.8	54.4	54.4		2,2-1,6	1	1				14		7		27	13	9
nantes	61	35	0	0	0	1	0	0	1	1	1	11.53	0.5	0	0	7	0	1	0	1	0	0	1	0	2	2	1	2	35.9344	55	74.8	74.8	74.8	54.4	54.4	54	2,2-1,6	1	0	35	29	19	11	7	5	2	22	11	5
nantes	64	43	1	1	0	0	1	0	1	0	2	17	1	0	0	7	1	1	1	0	0	1	0	0	1	2	0	0	35.9344	50	70	70	70	70	0		2	0	1	58	40	20	10	9	1	0	14	10	2
nantes	69	65	0	0	0	0	0	1	0	1	2	12	0.833333	0	0	7	1	1	1	0	0	1	0	0	1	2	0	0	35.9016	57	80	80	80	46	46		2	0	0
nantes	59	26	1	0	0	0	0	0	0	0	2	19.5	0.833333	0	0	7	1	1	1	0	0	1	0	0	1	2	1	4	28.3607	49	74.8	74.8	74.8	74.8	54.4	54	2,2-1,6	1	0	86	50	32	20	15	10	5	20	11	7
nantes	75	9	0	0	0	1	0	1	0	1	2	7.03	0.333333	0	0	9	0	0	0	1	0	0	1	0	2	2	0	0	9.77049	50	74.8	74.8	54.4	54.4	54.4		2,2-1,6	1	0	60	42	28	15	12	8	5	12	5	3
nantes	74	42	1	0	0	0	1	0	0	0	2	9.87	0.5	0	0	7	0	1	0	0	0	1	0	0	1	1	0	0	0	27	66		54	54	54		2.2	0	1	14	7	2	1	0	0	0	4	0	0
nantes	63	17	1	1	1	0	0	0	0	0		3.1	0.692308	0	0	8	1	1	0	1	0	0	1	0	2	2	1	3	22.3607	59	76	76	76	50	50	50	2	0	0	66	45	37	30	25	15	12	35	24	15
nantes	74	72	0	0	0	0	1	0	0	1	3	6.43	1	0	0	7	1	1	0	1	0	0	1	0	2	2	0	0	40.8852	53	74.8	74.8	74.8	54.4	54.4		2,2-1,6	1	0	68	50	34	24	19	13	7	72	45	25
nantes	71	7	0	0	0	0	1	0	0	0	2	217	0.571429	0	0	7	1	1	0	0	0	1	0	0	1	1	1	2	7.90164	60	77	77	77	54	54	74	2,08-2-1,46	1	0	74	62	41	29	24	17	5	57	18	9
nantes	69	5	0	0	0	0	1	0	0	0		20.97	1	0	0	8	0	1	0	1	0	0	1	0	2	2	0	0	8.65574	64	77	77	77	55	55		2,08-1,48	1	1	77	58	36	22	19	17	14	42	14	10
nantes	50	10	0	0	0	0	1	0	0	0	2	8.22	0.75	0	0	7	1	0	1	1	0	0	1	0	2	3	0	0	17.7049	51	74.8	74.8	74.8	54.4	54.4		2,2-1,6	1	0	72	52	37	24	18	13	7	26	16	8
nantes	72	7	0	0	0	0	1	0	0	1	3	8.15	0.625	0	0	9	1	1	0	1	1	0	0	1	3	3	0	0	11.4754	63	77	77	55	55	55		2,08-1,6	1	1	87	67	49	27	22	18	13	67	31	23.7
nantes	73	28	0	0	0	0	1	0	0	0	3	10.43	0.916667	0	0	8	0	1	1	1	0	0	1	0	2	4	1	2	29.5082	55	74.8	74.8	54.4	54.4	54.4	54	2,2-1,6	1	0	83	29	19	11	8	5	3	25	17	11
nantes	75	30	0	0	0	1	1	0	1	0	2	11.1	0.5	0	0	8	1	0	0	1	1	0	0	1	3	3	0	0	33.541	66	76	76	0	0	0		2	0	1	55	39	31	22	18	14	7	30	24	17
nantes	66	29	0	0	0	0	0	0	0	0	3	200	0.916667	0	0	7	1	1	1	1	1	0	0	1	3	6	0	0	31.0492	50	74.8	74.8	54.4	54.4	54.4		2,2-1,6	1	0	62	40	25	17	14	9	4	32	22	14
nantes	83	8	0	0	0	1	1	0	0	1	2	13.29		0	0	6	1	1	0	1	1	0	0	1	3	3	0	0	0	57	78	78	78	78	0		2	0	1	58	42	35	28	23	18	10	15	13	11
nantes	69	16	0	0	0	1	1	0	0	0	2	26.2	1	0	0	7	0	0	0	0	0	1	0	0	1	1	1	0	18.2623	50	74.8	74.8	74.8	54.4	54.4	68	2,2-2-1,6	1	0	72	52	35	17	12	7	3	12	7	4
nantes	74	44	0	0	0	1	1	1	1	0	3	32	0.25	0	0	7	1	0	0	1	0	0	1	0	2	2	0	0	35.9344	51	74.8	74.8	54.4	54.4	54.4		2,2-1,6	1	0	82	60	45	31	25	15	5	56	45	25
nantes	77	63	0	0	0	1	0	1	0	1	2	24.72	0.916667	0	0	8	1	1	0	1	1	0	0	1	3	3	0	0	35.9344	36	70	70	70	46	46		2	0	0	45	32	22	14	10	5	0	30	18	5
nantes	80	19	1	1	0	1	1	0	0	0	1	6.9	1	0	0	7	1	1	0	0	0	1	0	0	1	1	1	0	19.7049	51	74.8	74.8	74.8	74.8	54.4	54	2,2-1,6	1	0	98	78	65	42	32	19	5	54	35	20
nantes	57	59	0	0	0	0	0	0	0	1	1	19.29	0.5	0	0	6	1	1	1	1	1	0	0	1	3	6	1	2	35.9016	55	74.8	74.8	54.4	54.4	54.4	54	2,2-1,6	1	0	56	45	37	28	21	15	7	46	30	17
nantes	60	54	0	0	0	0	1	0	0	1	2	9.8	0.666667	0	0	7	0	1	1	1	0	0	1	0	2	4	1	0	35.9016	49	74.8	74.8	54.4	54.4	54.4	54	2,2-1,6	1	0	100	77	39	22	16	11	5	37	21	10
nantes	72	3	0	0	0	1	1	1	1	0	2	8.9	1	0	0	7	1	1	1	1	0	0	1	0	2	4	1	0	5.18033	61	77	77	54	54	54	74	2,08-2-1,46	1	0	74	48	28	16	12	8	5	30	12	6
nantes	66	6	0	0	0	0	1	0	0	0	2	21.4	0.5	0	0	7	1	1	1	1	0	0	1	0	2	4	0	0	10.2951	28	74.8	74.8	74.8	54.4	54.4		2,2-1,6	1	0	65	52	42	19	17	13	10	22	12	9
nantes	61	31	0	0	0	0	0	0	0	0	2	35.68	0.5	0	0	7	0	1	0	1	0	0	1	0	2	2	1	1	32.0984	50	74.8	74.8	54.4	54.4	54.4	54	2,2-1,6	1	0	67	46	33	22	18	12	6	35	20	14
nantes	64	44	0	0	0	0	0	0	0	0		29.18	0.333333	0	0	6	0	1	1	1	0	0	1	0	2	4	0	0	35.9344	64	74.8	74.8	74.8	74.8	54.4		2,2-1,6	1	0	84	58	44	31	25	20	13	33	18	13
brest	76	26	0	0	0	0	1	1	1	1	3	6.13	0.1875	0	0	6	1	1	0	0	0	1	0	0	1	1	0	0	18.5902	56	76	76	46	46	46		1.8	0	1	67	42	25	19	16	12	5	13	10	9
brest	68	15	0	0	0	1	1	1	0	0		16.69	0.5	0	0	6	1	1	0	0	0	1	0	0	1	1	0	0	17.9672	58	76	76	46	46	46		2	0	1	60	36	20	14	12	9	3	12	9	6
brest	60	14	0	0	0	0	0	0	0	1	2	9.14	0.833333	0	0	8	1	1	1	0	0	1	0	0	1	2	0	0	15.4426	53	76	76	46	46	46		2	0	1	69	46	28	18	14	8	0	18	14	11
brest	78	16	0	0	0	1	1	1	1	1	1	46	0.5	0	0	7	1	1	1	0	0	1	0	0	1	2	0	0	17.6393	56	76	76	46	46	46		2	0	1	71	50	25	17	14	10	1	43	36	27
brest	77	15	0	0	0	1	1	1	0	1		158	0.833333	0	0	9	1	0	1	0	0	1	0	0	1	2	1	5	19.6066	55	76	76	56	56	46	56	2	0	1	72	46	33	19	15	12	0	31	23	17
brest	59	26	0	0	0	1	0	1	0	0		6.79	0.0833333	0	0	6	1	0	0	0	0	1	0	0	1	1	0	0	4.29508	58	76	76	46	46	46		2	0	1	64	37	18	12	8	5	0	26	19	15
brest	68	13	1	0	0	0	0	0	0	1	3	9.7	0.166667	0	0	9	1	0	1	0	0	0	0	0	1	2	1	4	5.11475	51	76	76	46	46	46	46	2	0	1	69	45	31	23	19	14	1	38	28	20
brest	74	13	0	0	0	1	0	1	0	1	3	17.6	1	0	0	9	1	1	1	0	0	0	0	0	1	2	1	0	15.5082	57	76	76	45	46	46	46	2	0	1	57	39	30	22	19	15	4	36	28	20
brest	73	3	0	0	0	0	0	0	0	1	2	21	0.1875	0	0	7	1	0	0	0	1	0	0	1	3	1	0	0	6.13115	58	78	78	46	46	46		2	0	1	79	50	23	17	14	10	4	33	28	20
brest	71	20	0	0	0	0	0	1	0	0	2	7.47	1	0	0	9	1	1	1	0	0	1	0	0	1	2	0	0	18	57	76	76	46	46	46		2	0	1	82	48	22	10	6	4	1	31	25	17
brest	70	11	0	0	0	0	1	0	0	1	1	6.9	0.666667	0	0	6	1	1	0	0	0	1	0	0	1	1	0	0	11.8361	52	76	76	76	46	46		2	0	1	76	57	41	27	20	14	4	24	20	16
brest	63	14	0	0	0	0	0	0	0	1	2	8.38	0.875	0	0	6	1	1	0	0	0	1	0	0	1	1	0	0	6.98361	57	76	76	46	46	46		2	0	1	80	48	32	18	15	11	0	25	21	16
brest	71	14	1	1	0	1	1	0	0	0	3	24	1	0	0	9	1	0	0	0	0	1	0	0	1	1	0	0	31.6066	64	76	76	46	46	46		2	0	1	82	65	37	25	19	14	4	40	29	21
brest	75	8	0	0	0	1	1	1	0	0	1	52	0.416667	0	0	7	1	0	0	0	0	1	0	0	1	1	0	0	10.3279	71	78	78	56	46	46		2	0	1	66	42	27	20	16	13	7	26	20	14
brest	70	19	0	0	0	0	1	0	0	1	1	17	0.55	0	0	9	1	1	1	0	0	0	0	0	1	2	1	0	21.5738	57	76	76	76	56	46	56	2	0	1	65	43	31	24	20	15	3	37	30	20
brest	72	14	0	0	0	0	0	1	0	0	1	51.84	0.733333	0	0	9	1	1	0	0	0	1	0	0	1	1	0	0	16	56	76	76	46	46	46		2	0	1	64	41	25	21	18	15	5	32	25	20
brest	42	42	0	0	0	0	0	0	0	0	2	100.7	1	0	0	7	0	1	0	0	1	0	0	0	1	1	1	0	33	64	76	76	60	60	45	45	2	0	0	100	94	71	42	32	22	0	36	26	21
brest	68	14	0	0	0	1	1	1	0	1	1	30	0.5	0	0	6	1	1	1	0	0	1	0	0	1	2	0	0	15.377	55	76	76	46	46	46		2	0	1	69	41	22	12	10	7	1	34	24	18
brest	79	7	1	1	0	1	1	1	1	1	2	16.4	0.5625	0	0	9	1	1	1	0	0	1	0	0	1	2	0	0	7.08197	58	76	76	46	46	46		2	0	1	57	46	13	5	3	2	0	34	29	22
brest	69	38	0	0	0	0	0	1	0	1	2	18	0.333333	0	0	9	1	1	1	0	0	1	0	0	1	1	0	0	22.4262	63	75.6	75.6	45	45	45		1.8	0	0	99	88	62	38	30	21	3	42	34	28
brest	69	25	0	0	0	0	0	0	0	0	3	40	1	0	0	7	1	1	1	0	0	1	0	0	1	2	0	0	27.541	57	76	76	46	46	46		2	0	1	81	52	32	22	18	13	5	24	18	13
toulouse	59	48	0	0	0	0	0	0	0	0		12	0.333333	0	0	8	1	0	0	0	0	1	0	0	1	1	1	3	34.7541	57	76	76	76	76	46	46	2	0	0	88	64	40	23	16	10	0	30	18	8
toulouse	66	46	0	0	0	0	0	0	0	1		25	0.416667	0	0	6	1	1	1	1	0	0	1	0	2	3	0	0	30.7213	63	78	78	78	78	46		2	0	0	86	60	38	22	15	8	0	57	40	24
toulouse	72	21	0	0	0	0	0	0	0	1	2	23	0.473684	1	1	7	1	0	1	1	0	0	1	0	2	3	0	0	23.1803	52	78	78	78	78	46		2	0	0	87	63	37	23	16	10	1	32	19	10
toulouse	60	16	0	0	0	0	0	0	0	0	1	21	1	0	0	7	1	1	1	0	0	1	0	0	1	2	0	0	16.8525	58	78	78	78	78	46		2	0	0	91	74	46	30	20	10	1	54	37	22
toulouse	72	31	0	0	0	0	1	0	0	0	2	12.42	0.666667	0	0	8	1	0	0	0	0	1	0	0	1	1	1	1	23.4098	55	78	78	78	78	46	46	2	0	0	100	100	40	27	18	12	7	24	14	8
toulouse	72	25	0	0	0	0	0	0	0	0	2	12	0.5	1	1	7	1	1	1	1	0	0	1	0	2	3	0	0	36.5574	62	78	78	78	78	46		2	0	0	92	67	48	31	22	13	0	37	27	18
toulouse	58	33	0	0	0	0	0	0	0	0	2	8.45	1	1	1	7	1	1	1	1	0	0	1	0	2	3	1	1	33.9672	56	78	78	78	78	46	46	2	0	0	83	69	49	27	17	8	1	35	23	12
toulouse	75	58	0	0	0	1	0	1	0	0		10.82	0.2	0	0	8	1	0	0	1	1	0	0	1	3	3	0	0	26.7213	59	80	80	80	80	46		2	0	0	88	75	48	32	22	12	1	38	26	16
toulouse	73	51	0	0	0	0	1	1	0	0	3	13.57	0.333333	0	0	7	1	0	0	0	0	1	0	0	1	1	0	0	35.9672	55	78	78	46	46	46		2	0	0	75	51	24	15	11	6	0	37	30	20
toulouse	64	36	0	0	0	0	0	0	0	0	2	6.11	0.705882	1	0	8	1	1	0	0	0	1	0	0	1	1	0	0	34.8197	58	78	78	78	78	46		2	0	0	83	63	44	29	22	15	1	22	15	8
toulouse	80	35	0	0	0	0	0	0	0	0	3	5.5	0.5	0	0	7	1	1	0	0	0	1	0	0	1	1	0	0	35.9016	57	78	78	78	78	46		2	0	0	84	67	45	25	17	9	2	22	15	11
toulouse	64	52	0	0	0	0	0	0	0	0	3	150	0.333333	0	0	7	1	0	0	1	1	0	0	1	3	1	1	4	29.0492	57	76	76	76	76	46	66	2	0	0	75	52	38	28	24	18	0	25	12	5
toulouse	74	19	1	1	0	0	0	0	0	0	2	28		1	0	7	1	0	0	1	0	0	1	0	2	2	0	0	17.4098	56	78	78	46	46	46		2	0	0	90	68	43	23	17	10	2	28	18	12
toulouse	69	5	0	0	0	0	0	0	0	0		15	0.666667	0	0	7	0	1	0	0	0	1	0	0	1	1	0	0	6.19672	58	78	78	78	78	46		2	0	0	90	70	47	31	23	14	0	62	37	20
toulouse	64	71	1	0	0	0	1	0	0	0	3	19		0	0	6	1	0	0	0	0	1	0	0	1	2	1	2	35.3115	70	76	76	76	76	46	46	2	0	0	73	35	19	12	8	5	0	30	22	12
toulouse	79	3	1	1	0	1	0	0	0	0	1	5.94		0	0	8	1	1	1	1	1	0	0	1	3	6	0	0	5.21311	60	78	78	78	78	46		2	0	0	74	65	35	20	15	10	0	46	32	20
toulouse	67	62	0	0	0	0	0	0	0	0	2	8	0.333333	1	1	8	1	0	0	0	0	1	0	0	1	1	0	0	38.2623	55	78	78	78	46	46		2	0	0	94	76	47	31	23	15	0	32	22	13
toulouse	47	33	0	0	0	0	0	0	0	0	3	5.76	0.833333	0	0	9	1	1	1	0	0	1	0	0	1	2	1	0	35.0492	54	78	78	78	78	46	46	2	0	0	72	57	33	20	13	8	0	10	8	6
toulouse	55	12	1	1	0	1	0	0	0	0	2	120	1	1	1	7	1	1	0	0	0	1	0	0	1	3	0	0	14.2295	52	78	78	78	78	46		2	0	0	91	76	42	20	13	7	1	26	15	6
toulouse	81	15	0	0	0	0	1	0	0	0	2	7.72	0.636364	1	1	8	1	0	0	0	0	1	0	0	1	1	1	2	32.2295	51	78	78	78	78	46	70	2	0	0	88	64	42	25	17	9	1	38	27	17
toulouse	58	46	0	0	0	0	0	0	0	0	2	159	1	0	0	9	1	1	1	1	0	0	1	0	2	2	1	1	48.7213	69	78	78	78	78	46	66	2	0	0	84	59	37	20	14	9	0	35	21	10
toulouse	75	9	0	0	0	0	0	0	1	1		9.29	0.416667	0	0	7	0	0	0	0	0	1	0	0	1	1	1	4	14.5246	77	78	78	78	78	46	70	2	0	0	95	77	50	31	22	13	1	72	40	22
toulouse	68	36	0	0	0	1	1	1	0	1	1	12.17	0.333333	0	0	8	0	0	0	0	0	1	0	0	1	2	0	0	37.6393	61	78	78	78	78	46		2	0	0	93	70	33	18	10	7	1	37	21	10
toulouse	65	33	0	0	0	0	1	0	0	0	2	13.9	0.666667	1	1	7	1	0	0	0	0	1	0	0	1	1	0	0	34.1967	58	78	78	78	78	46		2	0	0	91	73	46	13	7	4	1	21	11	7
toulouse	79	2	1	1	0	0	0	0	0	0		28		0	0	7	0	0	1	0	0	1	0	0	1	2	0	0	3.31148	51	76	76	76	76	46		2	0	0	87	67	45	29	22	15	0	62	46	30
toulouse	76	14	0	0	0	0	1	0	1	0	3	28	1	1	1	7	0	1	0	1	0	0	1	0	2	2	0	0	15.3115	61	78	78	78	78	46		2	0	0	95	71	46	27	18	10	1	33	22	15
toulouse	79	2	1	1	0	1	1	1	1	1	3	45	1	1	1	9	1	1	0	1	1	0	0	1	3	3	0	0	3.34426	58	78	78	78	78	46		2	0	0	86	63	43	22	15	10	0	37	28	18
toulouse	72	13	0	0	0	1	1	1	0	0	2	11	0.416667	0	0	7	1	0	0	1	0	0	1	0	2	2	0	0	10.5246	57	78	78	78	78	46		2	0	0	95	72	46	27	19	13	1	40	28	17
toulouse	58	50	1	0	0	0	0	0	0	0	3	113	1	0	0	8	1	1	1	0	0	1	0	0	1	2	1	7	54.3279	57	78	78	78	78	46	46	2	0	0	86	67	42	24	18	13	1	38	26	15
toulouse	66	24	0	0	0	0	1	0	0	0	2	9.4	1	0	0	7	0	0	0	0	0	1	0	0	1	1	0	0	5.96721	57	78	78	78	78	46		2	0	0	91	75	42	15	8	3	1	40	24	13
toulouse	78	13	0	0	0	1	0	1	0	0	3	13	0.25	0	0	7	1	1	0	0	0	1	0	0	1	1	0	0	15.9672	61	78	78	78	78	46		2	0	0	87	70	47	27	18	10	0	53	35	19
toulouse	63	75	0	0	0	0	0	0	0	0	3	60	0.882353	0	0	7	1	1	1	0	0	1	0	0	1	2	0	0	6	51	76	76	46	46	46		2	0	0	91	74	49	30	19	8	0	47	35	23
toulouse	68	85	1	0	0	0	0	0	0	1	3	5	1	0	0	8	0	1	0	1	0	0	1	0	2	2	0	0	36.2623	54	78	78	46	46	46		2	0	0	87	71	46	27	18	8	0	34	24	14
toulouse	69	20	0	0	0	0	1	0	0	0	3	33	1	0	0	7	0	1	1	0	0	1	0	0	1	2	0	0	21.2459	57	78	78	78	78	46		2	0	0	94	73	37	19	14	9	1	55	37	17
toulouse	72	2	1	1	0	0	0	0	0	0	2	4.55	0.684211	0	0	7	1	1	1	1	0	0	1	0	2	4	0	0	3.47541	63	78	78	78	78	46		2	0	0	95	83	48	27	18	12	1	14	10	6
toulouse	68	56	0	0	0	0	1	0	0	1	3	6	0.833333	0	0	8	1	1	1	1	0	0	1	0	2	3	1	1	32.6557	58	78	78	78	78	68	68	2	0	0	94	75	48	26	22	11	2	45	30	17
toulouse	70	14	1	1	1	0	0	0	0	0		39.4		0	0	7	1	0	1	0	0	1	0	0	1	2	1	7	16.0984	70	78	78	78	78	46	46	2	0	0	94	57	26	13	10	7	1	44	34	25
rennes	84	11	0	0	0	1	1	0	0	0	3	8.11	0.916667	0	0	7	1	1	1	1	0	0	1	0	2	3	0	0	14	57	74	74	74	74	50		2	0	1	88.638	77.282	44.752	25.106	19.76	5.831	0	44.109	25.67	14.606
rennes	59	10	0	0	0	0	1	0	0	0		50	1	0	0	7	1	1	1	1	0	0	1	0	2	3	0	0	13.5082	58	78	78	78	50	50		2	0	1	90.188	78.486	37.365	15.136	11.11	7.747	0.261	24.604	17.838	11.979
rennes	68	3	0	0	0	0	0	0	0	0	2	28	0.833333	0	0	9	1	1	0	0	0	1	0	0	1	1	0	0	6.45902	58	78	78	78	50	0		2	0	1	85.103	64.131	38.332	23.466	18.685	14.266	3.928	35.566	20.564	13.002
rennes	70	83	0	0	0	0	0	0	0	1	3	4.7	1	0	0	8		1	0	1	1	0	0	1	3	3	0	0	33.9344	59	78	78	78	46	46		2	0	1	97.198	69.623	46.354	29.588	24.392	18.334	8.72	18.331	12.78	7.988
rennes	73	4	0	0	0	0	1	0	0	0	3	15	1	0	0	9	1	1	1	1	1	0	0	1	3	5	1	1	5.57377	60	78	78	78	50	50	50	2	0	1	88.211	72.285	49.36	34.633	28.365	21.295	2.946	59.505	33.596	20.803
rennes	66	40	0	0	0	0	1	0	1	0		7.55	0.25	0	0	7	0	0	1	0	0	1	0	0	1	2	0	0	33.082	57	76	76	50	50	50		2	0	1	93.605	59.218	37.228	25.179	19.31	12.098	0.009	30.273	14.126	9.112
rennes	75	54	0	0	0	1	1	1	0	1	2	8.7	0.5	0	0	7	0	0	0						1	1	1	1	33.4098	55	78	78	78	50	50	50	2	0	1	83.746	69.186	43.547	26.375	21.69	17.211	4.898	44.869	23.042	14.801
rennes	81	31	0	0	0	0	0	0	0	1	2	27	0.75	0	0	8	0	0	0	1	0	0	1	0	2	2	0	0	34.459	57	80	80	50	50	50		2	0	1	93.136	64.942	40.607	24.69	19.474	14.457	2.934	32.308	19.16	11.344
rennes	65	44	0	0	0	0	0	0	0	0	1	5.62		0	0	7	0	0	0	0	0	1	0	0	1	1	0	0	0	55	76	76	50	50	0		2	0	1	64.852	47.334	34.497	20.959	16.278	10.658	0.007	35.889	26.702	18.393
rennes	64	28	0	0	0	0	0	0	0	1	2	32.6		0	0	9	0	1	1	0	0	1	0	0	1	2	0	0	31.0492	64	78	78	50	50	50		2	0	1	94.591	76.913	48.768	31.221	24.355	17.998	3.574	79.853	62.572	49.767
rennes	66	23	0	0	0	0	0	0	0	0	3	16.4	0.5	0	0	9	1	0	0	0	0	1	0	0	1	1	0	0	25.4426	58	78	78	78	50	50		2	0	1	85.379	58.912	42.914	26.997	22.232	16.804	3.275	55.95	41.071	24.261
rennes	70	67	1	0	0	1	1	0	0	1	2	7.36	0.75	0	0	8	1	1	0						1	1	1	3	33.9016	56	76	76	76	50	50	50	2	0	1	97.158	94.61	49.329	23.099	17.654	11.555	1.774	55.983	44.211	24.297
rennes	78	29	0	0	0	1	0	1	0	1	1	11.6	0.333333	0	0	7	0	1	0	1	1	0	0	1	3	3	0	0	0	56	78	78	50	50	0		2	0	1	56.256	42.184	34.402	24.049	18.264	13.721	3.265	25.775	21.069	15.543
rennes	64	12	1	0	0	1	1	1	0	0	1	11	0.75	0	0	6	0	1	1	0	0	1	0	0	1	2	0	0	5.93443	55	76	76	76	50	50		2	0	1	66.642	51.2	34.93	21.785	17.226	12.078	0.018	50.815	32.884	16.953
rennes	69	82	1	0	0	0	0	0	0	0	2	11.9	0.75	0	0	8	1	1	1						1	2	0	0	83.8033	60	80	80	50	50	50		2	0	1	97.284	74.244	43.204	32.774	27.873	21.72	10.202	25.267	19.788	14.886
rennes	78	29	0	0	0	1	1	0	0	1	2	12.6	0.5625	0	0	7	0	1	0	1	0	0	1	0	2	2	0	0	32.459	59	78	78	50	50	50		2	0	1	86.215	69.753	42.387	22.826	18.235	13.377	1.186	16.367	7.315	4.807
rennes	64	16	0	0	0	0	0	0	0	0	3	9.22	0.583333	0	0	7	1	0	0	0	0	1	0	0	1	1	0	0	17.4426	57	78	78	78	50	50		2	0	1	84.546	64.664	42.34	27.034	21.831	16.862	0.634	50.422	24.691	14.262
rennes	82	15	0	0	0	0	0	0	0	0	2	35	1	0	0	9	0	1	1	1	0	0	1	0	2	5	1	0	16.459	58	78	78	78	50	50	50	2	0	1	87.279	72.369	37.763	22.871	19.131	14.706	0.187	43.68	29.341	19.147
rennes	86	10	0	0	0	1	1	1	0	0	3	11	1	0	0	7	1	1	0	1	0	0	1	0	2	2	0	0	12.9508	63	78	78	78	50	50		2	0	1	87.151	73.648	35.196	22.585	17.883	13.308	2.007	73.19	43.348	24.723
rennes	81	16	0	0	0	0	0	0	0	0	1	7.48	0.5	0	0	6	0	0	0	0	0	1	0	0	1	1	0	0	0	66	76	76	76	50	0		2	0	1	90.408	65.187	42.529	28.324	22.987	17.419	0.051	34.84	26.738	19.31
rennes	74	55	1	0	0	0	1	0	0	0	2	11.4	0.666667	0	0	7	1	0	0						1	1	0	0	58.2295	60	78	78	78	50	50		2	0	1	96.469	82.373	44.025	26.167	21.012	16.345	4.129	70.788	59.082	38.612
rennes	67	27	0	0	0	0	0	0	0	0		24.6	0.416667	0	0	9	0	0	0	1	0	0	1	0	2	2	0	0	30.0656	52	78	78	78	50	50		2	0	1	88.262	73.924	47.873	36.098	30.51	19.9	0	31.259	17.919	11.981
rennes	64	23	0	0	0	0	0	0	0	0	2	135	0.583333	0	0	7	1	1	0	0	0	1	0	0	1	1	0	0	17.9672	56	78	78	78	50	50		2	0	1	85.48	66.966	32.803	21.555	17.885	13.976	1.308	49.889	26.055	17.687
rennes	68	56	1	1	0	0	0	0	0	0	3	30	0.916667	0	0	8	1	1	1						1	2	0	0	37.4098	58	78	78	78	50	50		2	0	1	97.378	89.362	58.592	36.928	29.083	23.021	6.301	42.865	29.877	19.487
rennes	72	9	0	0	0	0	1	0	0	0		47	1	0	0	9	1	1	1	0	0	1	0	0	1	2	1	6	12.4262	59	76	76	76	50	50	60	2	0	1	94.86	83.41	76.023	60.562	47.286	25.561	0	66.014	36.355	18.022
rennes	74	31	0	0	0	0	1	0	0	0	2	8.48	0.583333	1	1	7	0	0	0	0	0	1	0	0	1	1	0	0	32.8525	56	78	78	78	50	50		2	0	1	85.241	76.351	62.088	35.261	28.127	20.211	0.702	71.832	48.161	33.94
rennes	69	75	0	0	0	0	0	0	0	0	2	41	0.833333	0	0	7	1	0	0	0	0	1	0	0	1	1	0	0	36.918	58	78	78	50	50	50		2	0	1	94.517	66.556	31.797	21.873	18.024	13.893	3.275	36.601	26.274	18.582
rennes	63	23	0	0	0	0	0	0	0	0	2	2.63	0.666667	0	0	7	1	1	0	0	0	1	0	0	1	1	1	1	14.9508	58	76	76	76	50	50	60	2	0	1	92.255	82.691	62.74	39.601	31.134	20.713	0.04	93.159	66.035	41.74
rennes	67	94	0	0	0	1	1	1	0	0	1	4.92		0	0	7	1	1	0	0	0	1	0	0	1	1	0	0	2.91803	58	74	74	50	50	0		2	0	1	39.411	27.01	20.029	14.183	9.485	1.044	0	14.361	11.754	7.679
rennes	62	32	1	0	0	0	0	0	0	1	2	10.4	0.5	0	0	7	1	0	0	0	0	1	0	0	1	1	0	0	25.1148	57	78	78	78	50	50		2	0	1	84.391	55.59	42.2	30.52	24.549	17.761	1.92	58.812	31.79	16.055
rennes	70	65	0	0	0	0	0	0	1	0		10.6	0.25	0	0	7		1	0	0	0	1	0	0	1	1	0	0	0	58	80	80	80	50	0		2	0	1	74.487	60.872	48.05	35.118	29.475	23.228	11.272	22.672	18.283	14.017
rennes	61	80	0	0	0	0	0	0	0	0	2	6.21	1	0	0	8		1	1						1	1	0	0	80.7869	59	76	76	46	46	46		2	0	1	89.976	66.492	37.616	26.158	20.601	13.699	0.209	45.649	36.156	24.791
rennes	74	16	0	0	0	1	0	1	0	0	3	46	0.733333	0	0	7	0	1	1	0	0	1	0	0	1	2	0	0	18.1311	59	78	78	78	50	50		2	0	1	81.46	69.051	44.793	27.829	22.052	17.228	5.551	77.647	43.58	27.302
rennes	66	15	0	0	0	0	0	0	0	1	3	6.3	0.5	0	0	7	1	1	1						1	2	0	0	16.9836	58	78	78	78	50	50		2	0	1	82.426	68.616	46.424	32.314	26.914	21.543	7.447	40.772	31.236	22.72
rennes	62	30	1	1	1	0	0	0	0	1	2	15.8	0.833333	0	0	9	1	1	1						1	2	0	0	29.7377	59	78	78	78	46	46		2	0	1	98.584	92.325	55.684	28.119	21.152	15.51	5.789	20.784	11.372	6.02
rennes	64	46	0	0	0	0	1	0	1	0	3	15.28	0.916667		0	9	1	0	0	1		0	1	0	2	2	0	0	35.4754	61	78	78	78	50	50		2	0	1	90.283	77.481	38.082	25.109	20.519	14.934	2.346	25.478	14.8	9.969
rennes	63	13	1	1	0	0	0	0	0	0		14.9	0.666667	0	0	7	1	1	1						1	1	1	3	14	57	78	78	78	50	50	60	2	0	1	90.528	70.925	39.008	25.311	19.142	12.556	0	55.574	38.109	24.313
rennes	70	23	0	0	0	0	0	0	0	0	3	23	0.375	0	0	8	1	0	0	1	1	0	0	1	3	3	0	0	22.3279	59	78	78	78	50	50		2	0	1	79.456	48.303	35.753	27.422	23.256	18.807	4.786	19.043	7.281	4.874
rennes	65	63	1	0	0	1	1	1	1	1	3	22	0.833333	0	0	7	1	1	0	0	0	1	0	0	1	1	0	0	24.5246	57	80	80	50	50	50		2	0	1	90.661	61.2	29.592	18.175	13.881	9.536	5.419	24.865	12.625	8.267
rennes	80	68	0	0	0	0	1	0	0	1	3	5.24	0.75	0	0	8	1	1	1	0	0	1	0	0	1	2	1	2	34.9508	57	76	76	50	50	50	50	2	0	1	96.351	86.172	47.18	24.842	18.47	13.248	4.84	73.504	55.2	27.591
rennes	54	15	0	0	0	0	0	0	0	0	3	17.8	1	0	0	9	1	1	1	1	0	0	1	0	2	4	1	3	10.0984	57	76	76	76	50	50	60	2	0	1	96.692	82.007	63.879	46.949	36.366	23.503	0	68.113	49.654	32.177
rennes	72	23	0	0	0	0	1	0	0	0	1	6.14	0.666667	0	0	7	0	1	1	0	0	1	0	0	1	2	0	0	25.0492	59	78	78	78	50	50		2	0	1	80.281	64.95	35.546	24.558	20.248	13.51	0.026	26.616	14.426	8.796
rennes	71	12	1	1	1	0	0	0	0	0	2	9	0.75	0	0	8	1	1	1	1	1	0	0	1	3	3	1	3	14.8525	58	76	76	76	50	50	50	2	0	1	92.519	75.261	38.752	24.629	20.347	13.616	0	80.377	62.11	45.353
rennes	58	80	0	0	0	0	0	0	0	0	2	15.24	0.416667	1	1	7	0	1	1	0	0	1	0	0	1	2	0	0	36.9508	61	80	80	50	50	0		2	0	1	60.926	39.888	30.469	21.57	17.981	14.463	8.131	16.366	12.014	8.632
rennes	73	22	0	0	0	0	1	0	0	1	2	76.8	0.916667	0	0	7	0	1	1	1	0	0	1	0	2	3	0	0	24.8852	58	78	78	78	50	50		2	0	1	93.534	72.506	42.275	22.381	17.853	12.03	0.067	30.956	19.35	14.087
rennes	67	43	0	0	0	0	1	0	0	0	3	26	1	0	0	7	1	1	1	1	1	0	0	1	3	5	0	0	36.3934	57	78	78	78	50	50		2	0	1	94.258	80.257	52.616	34.055	28.428	22.278	3.216	52.967	29.614	16.473
rennes	50	10	0	0	0	0	0	0	0	0	2	18	1	0	0	8	1	1	1	1	0	0	1	0	2	3	0	0	12.4262	65	78	78	78	50	50		2	0	1	90.313	83.287	51.449	24.343	19.215	13.122	0.009	54.441	39.585	26.783
rennes	68	26	1	1	1	1	1	1	0	0	2	43.15	0.5	0	0	9	1	1	1	1	1	0	0	1	3	4	0	0	28	57	78	78	78	50	50		2	0	1	90.794	65.147	43.88	28.593	21.631	15.537	2.35	74.45	58.009	43.678
rennes	70	47	0	0	0	0	0	0	0	0	2	84	1	0	0	8	1	0	0						1	1	1	2	35.9344	63	78	78	50	50	50	50	2	0	1	90.037	71.604	37.652	25.958	21.066	15.562	0.657	66.545	41.088	24.871
rennes	74	79	1	0	0	0	0	0	0	0	2	21.36	0.5	0	0	7	1	1	0						1	1	1	2	34.2951	56	78	78	46	46	46	46	2	0	1	92.807	65.666	29.555	19.837	16.356	12.311	2.259	46.205	31.748	20.788
rennes	58	71	0	0	0	0	0	0	1	0	3	11	1	0	0	7									1	1	0	0	35.9344	63	78	78	78	50	50		2	0	1	82.48	63.36	37.383	24.705	20.714	16.133	5.638	35.42	18.357	12.267
rennes	68	25	0	0	0	0	0	0	1	1	3	13	1	0	0	9	1	1	1	1	1	0	0	1	3	5	1	9	28.459	57	76	76	54	54	54	54	2	0	1	92.591	60.987	26.715	16.423	11.953	6.065	0	30.957	14.514	9.496
rennes	61	45	1	0	0	0	1	0	1	0	3	7.91	0.916667	0	0	8	1	1	1		0	1	0	0	1	2	0	0	59.0164	62	78	78	78	50	50		2	0	1	90.528	66.57	41.872	29.721	25.074	19.004	1.716	87.417	68.795	46.748
rennes	66	50	1	1	1	0	1	0	0	0	1	4.56	0.75	0	0	7	1	1	1	0	0	1	0	0	1	2	0	0	37.377	60	78	78	50	50	0		2	0	1	65.638	48.423	36.125	24.094	18.741	13.587	3.922	21.868	13.918	9.631
rennes	74	74	0	0	0	0	0	0	0	1	2	5.88	0.416667	0	0	8	0	0	0						1	1	0	0	41.9672	59	78	78	78	46	46		2	0	1	95.581	65.101	35.067	23.264	19.465	15.62	7.45	37.798	29.689	20.612
rennes	61	28	0	0	0	0	0	0	0	0	3	24.54	0.75	0	0	9	1	1	1	0	0	1	0	0	1	2	1	2	29.4426	57	78	78	78	50	50	60	2	0	1	93.43	69.752	44.233	25.954	21.408	16.662	1.473	96.464	70.855	51.243
rennes	74	12	0	0	0	0	0	0	0	0	3	7	0.25	0	0	7	1	0	0	0	0	1	0	0	1	1	0	0	13.9672	58	78	78	78	50	50		2	0	1	86.21	64.823	37.621	27.871	23.571	18.453	0.853	41.592	17.769	11.178
rennes	75	4	1	1	0	1	0	0	0	0	2	25	1	0	0	7	1	1	0	0	0	1	0	0	1	1	0	0	9.57377	62	76	76	50	50	0		2	0	1	58.436	37.637	26.501	13.041	9.92	6.004	0.247	16.576	12.759	7.72
rennes	63	76	1	0	0	0	0	0	0	1	3	7.4	0.5	0	0	8	1		1						1	1	1	0	36.3934	61	78	78	46	46	46	50	2	0	1	98.842	74.949	39.096	21.391	17.378	13.431	5.179	22.178	15.309	10.219
rennes	71	79	0	0	0	0	1	0	0	0		100	0.5	0	0	7	1	1	0	0	0	1	0	0	1	1	0	0	35.9344	64	80	80	80	46	46		2	0	1	93.489	87.839	58.534	30.298	23.22	15.661	2.061	61.488	45.47	30.283
rennes	74	17	0	0	0	0	0	0	0	0	2	27	0.916667	0	0	9	1	1	1	1	0	0	1	0	2	2	1	3	20.459	57	78	78	78	78	50	60	2	0	1	89.342	74.654	46.509	25.254	18.791	11.38	0.01	54.397	36.494	22.403
rennes	64	86	0	0	0	0	1	0	0	0	3	6	0.615385	0	0	7			0						1	1	0	0	34.9508	58	80	80	46	46	46		2	0	1	85.94	59.195	25.679	17.589	14.658	11.486	5.156	10.58	8.242	6.254
rennes	58	82	1	0	0	0	0	0	1	0	2	13.9	0.5	0	0	7	1	1	1	1		0	1	0	2	3	0	0	36.918	62	80	80	50	50	50		2	0	1
rennes	54	95	0	0	0	0	0	0	0	1	2	7.26	0.833333	0	0	6	1	1							1	1	0	0	0	60	78	78	50	50	0		2	0	1	60.241	43.24	30.254	22.103	18.976	15.586	5.588	24.383	18.542	13.899
rennes	69	44	0	0	0	0	0	0	0	1	3	5.3	0.833333	0	0	7	1	1	1						1	2	0	0	38.918	58	78	78	78	50	50		2	0	1	87.275	65.261	42.687	33.489	29.088	23.691	5.031	71.538	53.886	36.88
rennes	70	25	0	0	0	1	1	0	0	1	2	9.56	0.75	0	0	7	1	1	0	1	1	0	0	1	3	3	0	0	26	70	76	76	76	50	50		2	0	1	88.228	70.855	34.06	22.024	17.373	10.815	0	37.421	18.319	11.06
rennes	77	19	0	0	0	1	0	0	0	0	3	71.7	1	0	0	9	0	1	1	0	0	1	0	0	1	2	0	0	19.8689	58	78	78	78	50	50		2	0	1	81.153	71.685	45.799	28.769	23.911	19.081	1.28	44.274	23.461	16.509
rennes	73	8	0	0	0	0	0	0	0	0	3	20	1	0	0	9	1	1	1	1	1	0	0	1	3	6	0	0	9.04918	61	78	78	78	50	50		2	0	1	99.499	97.741	93.774	30.8	19.79	0.891	0	86.378	58.257	27.468
rennes	70	45	1	1	1	0	0	0	0	0	3	20	1	0	0	8	1								1	1	1	2	46.7213	61	74	74	50	50	0	0	2	0	1	87.716	64.113	36.355	27.39	23.016	16.625	0.83	59.671	38.115	26.328
rennes	65	76	0	0	0	1	0	1	0	0	2	11.4	0.0833333	0	0	6	0	0	0	0	0	1	0	0	1	1	0	0	0	64	78	78	50	50	0	0	2	0	1	61.969	46.492	31.967	22.897	18.83	14.937	4.638	22.64	16.868	11.831
rennes	73	18	0	0	0	0	1	0	0	0	2	7.9	0.375	1	0	7	1	1	0	1	1	0	0	1	3	3	0	0	0	62	78	78	50	50	50		2	0	1	62.681	47.374	37.791	25.224	21.72	17.753	5.383	42.226	31.395	20.166
rennes	63	19	1	1	1	0	0	0	0	0	2	5.7	1	0	0	9	1	0	0	0	0	1	0	0	1	1	1	1	21.5082	59	80	80	80	50	50	50	2	0	1	96.116	87.749	55.747	30.952	21.423	15.756	6.896	40.734	28.726	20.27
rennes	48	45	0	0	0	0	0	0	0	1	3	45.22	1	0	0	7		1	0	0	0	1	0	0	1	1	0	0	37.0164	62	78	78	78	50	50		2	0	1	88.61	63.386	39.288	26.882	22.962	17.511	1.917	54.231	29.524	17.829
rennes	82	15	0	0	0	1	1	1	0	0	3	18.12	0.833333	0	0	7	1	1	0	0	0	1	0	0	1	1	0	0	17.4426	57	78	78	78	78	50		2	0	1	93.583	74.687	46.892	32.759	27.908	22.226	1.452	44.415	32.082	20.985
rennes	78	4	0	0	0	1	1	1	0	0		34.8	0.6	0	0	7	0	1	1	1	1	0	0	1	3	4	1	16	4.55738	58	76	76	76	50	50	60	2	0	1	92.119	82.233	65.746	33.603	25.48	18.001	0.053	76.438	55.894	32.945
rennes	84	31	0	0	0	0	0	0	0	1	3	26	0.916667	0	0	9	1	1	0	0	0	1	0	0	1	1	0	0	32.6885	55	74	74	74	50	50		2	0	1	92.573	82.47	73.06	38.172	17.242	6.246	0	92.314	64.34	40.706
rennes	75	77	0	0	0	0	0	0	0	1	1	8.16	0.25	0	0	6	1	1	0	0	0	1	0	0	1	1	0	0	32	57	78	78	78	50	0		2	0	1	61.148	42.222	32.545	25.368	21.934	16.935	2.37	22.09	17.721	14.129
rennes	68	64	1	0	0	0	1	0	0	0	2	8.6	0.25	0	0	8	0	0	0	0	0	1	0	0	1	1	0	0	35.9016	58	78	78	50	50	50		2	0	1	95.525	82.732	51.287	31.795	26.571	21.197	10.764	62.992	48.365	36.116
rennes	71	22	0	0	0	0	1	0	1	0	2	12	0.833333	0	0	7	1	1	0	0	0	1	0	0	1	2	0	0	25.5082	59	76	76	76	50	50		2	0	1	89.332	66.739	42.434	28.324	21.789	12.824	0	17.869	11.849	8.09
rennes	80	17	0	0	0	0	1	0	1	0	3	32.21	0.4375	0	0	9	1	1	0	1	0	0	1	0	2	2	0	0	19.4426	58	78	78	78	50	50		2	0	1	90.27	81.429	61.303	31.573	23.687	17.606	0.878	65.155	49.478	35.823
rennes	73	79	0	0	0	1	0	1	0	0	2	11.11	0.75	0	0	7	1	1	0	0	0	1	0	0	1	1	0	0	34.459	57	74	74	74	46	46		2	0	1	95.932	70.245	40.891	26.049	19.345	9.648	0	58.999	49.172	34.454
rennes	83	40	0	0	0	0	1	0	0	0	3	25	0.583333	0	0	8	0	1	1	1	1	0	0	1	3	4	0	0	36.2951	58	78	78	50	50	50		2	0	1	91.296	77.399	57.206	38.806	31.745	23.381	0.414	44.557	29.556	18.646
rennes	71	8	0	0	0	0	0	0	0	0	1	2.2	0.833333	0	0	7	1	1	0	1	1	0	0	1	3	3	0	0	10.918	58	78	78	78	50	50		2	0	1	89.495	61.641	38.082	26.599	21.599	15.837	1.235	42.566	22.644	15.486
rennes	69	38	0	0	0	0	1	0	1	0	3	166	1	0	0	9	1	1	1	1	1	0	0	1	3	5	0	0	39.4098	53	78	78	78	50	50		2	0	1	89.108	75.265	52.685	38.454	32.431	25	2.562	34.803	18.652	11.897
rennes	77	11	0	0	0	1	1	1	0	1	3	53.7	0.916667	0	0	7	1	1	0	1	0	0	1	0	2	2	0	0	13.0164	57	78	78	78	78	50		2	0	1	90.363	76.491	48.93	32.373	26.252	19.641	1.148	85.17	64.418	36.234
rennes	67	16	0	0	0	0	0	0	0	1	3	8.26	0.5	1	1	8	1	1	1	0	0	1	0	0	1	2	0	0	18.918	57	78	78	78	50	50		2	0	1	83.25	64.281	42.424	25.895	20.627	15.667	2.216	79.209	64.101	49.232
rennes	72	35	0	0	0	0	1	0	1	0	2	6.2	0.583333	0	0	7	0	1	0	0	0	1	0	0	1	1	0	0	5.93443	58	78	78	78	50	50		2	0	1	87.78	68.867	44.34	29.441	24.59	19.302	1.527	75.414	38.911	21.181
rennes	68	28	0	0	0	0	0	0	0	0	1	3.75	0.666667	0	0	7	0	1	1	0	0	1	0	0	1	2	0	0	6.03279	58	78	78	50	50	50		2	0	1	88.167	69.479	48.423	32.907	27.768	22.067	2.687	37.86	12.845	8.908
rennes	71	82	0	0	0	1	0	1	0	0		13	0.75	1	1	8	1	1	1						1	1	0	0	35.377	59	76	76	46	46	46		2	0	1	94.685	48.51	20.493	13.765	10.57	7.258	0.233	22.078	16.362	11.797
rennes	72	36	0	0	0	1	1	1	0	0	2	13.3	0.416667	0	0	7	0		0	0	0	1	0	0	1	1	0	0	39.377	58	78	78	50	50	50		2	0	1	90.784	79.689	52.375	28.316	20.369	13.741	0.877	61.247	44.541	32.231
rennes	63	72	0	0	0	0	1	0	1	1		36		0	0	8	1	1	0	0	0	1	0	0	1	1	1	1	31.9344	67	80	80	50	50	50	50	2	0	1	98.684	82.804	42.09	20.834	15.472	11.292	6.413	38.206	27.434	19.824
rennes	70	74	0	0	0	0	0	0	0	1	1	10.31	0.333333	0	0	7	0	0	0	0	0	1	0	0	1	1	0	0	0	56	76	76	76	50	0		2	0	1	68.121	54.018	39.326	30.789	22.527	13.313	0.903	25.29	19.206	11.973
rennes	68	27	0	0	0	0	0	0	1	0		8		0	0	6	0	1	0	1	1	0	0	1	3	3	0	0	0	59	78	78	78	50	0		2	0	1	61.843	38.908	30.488	22.464	19.213	14.944	4.941	31.838	21.601	15.661
rennes	63	95	1	0	0	0	0	0	0	0	2	5.28		0	0	7		1	0	0	0	1	0	0	1	1	0	0	99.1475	55	80	80	50	50	0		2	0	1	47.825	34.472	24.299	16.108	12.522	8.369	0.385	39.625	29.849	21.506
rennes	64	64	0	0	0	0	0	0	0	0	1	23	0.25	0	0	8	1	1	0						1	1	1	1	29.9672	65	80	80	80	50	50	50	2	0	1	94.956	76.47	49.294	32.777	27.393	21.069	4.331	46.773	34.285	24.452
rennes	71	23	0	0	0	0	0	0	0	0	1	18.67	0.75	0	0	7	1	1	0	1	1	0	0	1	3	3	0	0	25.9672	58	76	76	76	50	50		2	0	1	87.286	58.653	36.296	24.434	20.273	15.067	0	74.652	48.402	25.666
rennes	76	4	1	1	0	0	1	0	0	0	2	9.2	0.833333	0	0	7	1	1	0	0	0	1	0	0	1	1	0	0	0	58	80	80	50	50	50		2	0	1	97.139	87.417	43.82	24.921	17.518	12.325	4.458	35.975	19.328	13.505
rennes	81	32	1	0	0	0	0	0	0	0	2	19	0.416667	0	0	7	1	0	0	0	0	1	0	0	1	1	0	0	6.03279	56	76	76	50	50	50		2	0	1	86.175	68.728	47.914	32.348	25.656	18.334	0	35.592	21.552	15.087
rennes	81	20	0	0	0	0	1	0	0	1	3	9	1	0	0	9	1	0	1	0	0	1	0	0	1	2	0	0	23.9672	53	76	76	50	50	50		2	0	1	82.759	62.77	41.161	27.195	20.975	12.35	0	56.049	41.465	21.732
rennes	66	27	0	0	0	0	0	0	0	1	3	122	1	0	0	8	1	1	0	1	0	0	1	0	0	2	1	2	29.7049	59	74	74	50	50	50	50	2	0	1	85.154	67.74	45.563	29.989	23.473	16.204	1.715	44.28	20.503	11.096
rennes	58	88	0	0	0	1	1	0	0	0	3	94.7	1	1	1	8									1	1	0	0	32.459	58	80	80	46	46	46		2	0	1	99.275	77.714	39.84	26.732	22.176	17.433	7.322	66.777	50.891	34.061
rennes	62	42	0	0	0	0	0	0	0	1	3	90.4	0.916667	0	0	7		1	1	0	0	1	0	0	1	2	0	0	34.459	57	78	78	78	50	50		2	0	1	94.056	74.547	49.713	37.822	32.875	27.418	3.425	87.191	59.614	40.756
rennes	71	88	0	0	0	1	0	0	0	1	3	10.68	1	0	0	9	1	1	1	0	0	1	0	0	1	2	0	0	41.4098	58	80	80	46	46	46		2	0	1	90.492	57.22	23.776	10.542	6.983	2.809	0.146	69.511	58.816	46.971
rennes	72	20	1	1	0	1	0	1	0	1	3	21.24	1	0	0	8	1	1	0	0	0	1	0	0	1	1	0	0	23.7377	62	76	76	50	50	50		2	0	1	95.833	85.16	41.454	15.085	11.469	7.558	0.3	57.111	41.793	28.768
rennes	70	29	0	0	0	0	0	0	0	1	3	11.5	0.833333	0	0	8	1	1	0	0	0	1	0	0	1	1	1	1	32.2295	59	78	78	78	50	50	50	2	0	1	92.789	71.985	38.221	26.901	22.403	16.79	2.115	49.817	28.097	17.293
rennes	74	11	0	0	0	0	1	0	0	0	1	6.9	0.5	0	0	7	1	1	0	0	0	1	0	0	1	1	0	0	16.9836	61	76	76	76	50	50		2	0	1	86.611	62.084	32.388	21.427	16.66	11.512	0.014	19.374	11.669	6.624
[truncated: 30 more columns]
